# Supplementary material
Source: ML conference proceedings conference paper supplement (https://openreview.net/forum?id=gHCFduRo7o)
Supplement: supplementary_material [file attachment]

## 747 A Overview

748 In this supplementary material we provide the following information:

- 749 • Appendix B discuss other high-quality and Monte Carlo explainers.
- 750 • Appendix C discuss a guide to select the coverage  $\alpha$  when the agent providing selective
- 751 explanations has a budget for the average number of inferences to provide an explanation.
- 752 • Appendix D shows more experimental results on selective explanations.
- 753 • Appendix E shows the proofs for the theoretical results in Section 4.

## 754 B Additional Explanation Methods

755 In this section, we describe high-quality, Monte Carlo, and amortized explainers with further details.

### 756 B.1 High-Quality Explainers

757 **Shapley Values (SHAP)** [21] is a **high-quality** explainer that attributes a value  $\phi_i$  for each feature  $x_i$   
 758 in  $\mathbf{x} = (x_1, \dots, x_d)$  which is the marginal contribution of feature  $x_i$  if the model was to predict  $\mathbf{y}$  (2).

$$\phi_i(\mathbf{x}, \mathbf{y}) = \frac{1}{d} \sum_{S \subset [d] \setminus \{i\}} \binom{d-1}{|S|}^{-1} (h_{\mathbf{y}}(\mathbf{x}_{S \cup \{i\}}) - h_{\mathbf{y}}(\mathbf{x}_S)). \quad (13)$$

759 SHAP has several desirable properties and is widely used. However, as (2) indicates, computing  
 760 Shapley values and the attribution vector  $\text{HQ}(\mathbf{x}, \mathbf{y}) = (\phi_1(\mathbf{x}, \mathbf{y}), \dots, \phi_d(\mathbf{x}, \mathbf{y}))$  requires  $2^d$  inferences  
 761 from  $h$ , making SHAP impractical for large models where inference is costly. This has motivated  
 762 several approximation methods for SHAP, discussed next<sup>6</sup>.

763 **Local Interpretable Explanations (Lime).** Lime is another feature attribution method [28] widely  
 764 used to provide feature attributions. It relies on selecting combinations of features, removing these  
 765 features from the input to generate perturbations, and using these perturbations to approximate the  
 766 black box model  $h$  locally by a linear model. The coefficients of the linear model are considered to  
 767 be the attribution of each feature. Formally, given a weighting kernel  $\pi(S)$  and a penalty function  $\Omega$ ,  
 768 the attribution produced by lime are given by

$$(\phi, a) = \underset{\phi \in \mathbb{R}^d, a \in \mathbb{R}}{\operatorname{argmin}} \sum_{S \subset [d]} \pi(S) \left( h(\mathbf{x}_S) - a_0 - \sum_{i \in S} \phi_i \right), \quad (14)$$

769 where  $\text{HQ}(\mathbf{x}, \mathbf{y}) = \phi$ . As in SHAP, to compute the feature attributions using lime, we need to  
 770 perform a large number of model inferences, which is prohibitive for large models.

### 771 B.2 Monte Carlo Lime

772 **Shapley Value Sampling (SVS)** [23] is a **Monte Carlo** explainer that approximates SHAP by  
 773 restricting the sum in (2) to specific permutations of feature. SVS computes the attribution scores by  
 774 uniformly sampling  $m$  features permutations  $S_1, \dots, S_m$  restricting the sum in (2) and performing  
 775  $n = md + 1$  inferences. We denote SVS that samples  $m$  feature permutations by SVS- $m$ .

776 **Kernel Shap (KS)** [21] is a **Monte Carlo** explainer that approximate the Shapley values using the  
 777 fact that SHAP can be computed by solving the optimization problem

$$(\phi, a) = \underset{\phi \in \mathbb{R}^d, a \in \mathbb{R}}{\operatorname{argmin}} \sum_{i=1}^n \pi(S_i) \left( h(\mathbf{x}_{S_i}) - a_0 - \sum_{j \in S_i} \phi_j \right), \quad (15)$$

778 using  $\pi(S) = \binom{d}{|S|} |S| (d - |S|)$  and where  $\text{MC}^n(\mathbf{x}, \mathbf{y}) = \phi$ . Kernel Shap samples  $n > 0$  feature  
 779 combinations  $S_1, \dots, S_n$  and define the feature attributions to be given by the coefficients  $\phi$ . We refer  
 780 to Kernel Shap using  $n$  inferences as KS- $n$ . We use the KS- $n$  from the Captum library [17] for our  
 781 experiments.

---

<sup>6</sup>We also discuss Lime and its amortized version in Appendix B

782 **Sample Constrained Lime.** To approximate the attributions from Lime, we consider the sample-  
 783 contained version of (15). Instead of sampling all feature combinations in  $[d]$ , we only uniformly  
 784 sample a fixed number  $n$  of feature combinations  $S_1, \dots, S_n$ . For our experiments, shown in the  
 785 appendix, we use the Sample Constrained Lime from the Captum library [17].

### 786 B.3 Amortized Explainers

787 **Stochastic Amortization** [6] is a **Amortized** explainer that uses noisy Monte Carlo explanations  
 788 to learn high-quality explanations. Covert et al. [6] trained an amortized explainer  $\text{Amor} \in \mathcal{F}$  in a  
 789 hypothesis class  $\mathcal{F}$  (we use multilayer perceptrons) that takes an input and predicts an explanation.  
 790 Specifically, taking the amortized explainer to be the solution of the training problem given in (3).

$$\text{Amor} \in \underset{f \in \mathcal{F}}{\operatorname{argmin}} \sum_{(\mathbf{x}, \mathbf{y}) \in \mathcal{D}_{\text{train}}} \|f(\mathbf{x}, \mathbf{y}) - \text{MC}^n(\mathbf{x}, \mathbf{y})\|_2^2. \quad (16)$$

791 We are interested in explaining the predictions of large models for text classification. However, the  
 792 approach in (3) is only suitable for numerical inputs. Hence, we follow the approach from Yang et al.  
 793 [34] to explain the predictions of large language models, explained next.

794 **Amortized Shap for LLMs** [34] is a **Amortized** explainer similar to the one in (3) but tailored for  
 795 LLMs. First, the authors note that they can use the LLM to write all input texts  $\mathbf{x}$  as a sequence of  
 796 token embedding  $[e_1(\mathbf{x}), \dots, e_{|\mathbf{x}|}(\mathbf{x})]$  where  $e_i(\mathbf{x}) \in \mathbb{R}^d$  denotes the LLM embedding for the  $i$ -th  
 797 token contained in the input text  $\mathbf{x}$  and  $|\mathbf{x}|$  is the number of tokens in the input text. Second, they  
 798 restrict  $\mathcal{F}$  in (3) to be the set of all linear regressions that take the token embeddings and output the  
 799 token attribution score. Then, they solve the optimization problem in

$$W \in \underset{W \in \mathbb{R}^d, b \in \mathbb{R}}{\operatorname{argmin}} \sum_{(\mathbf{x}, \mathbf{y}) \in \mathcal{D}_{\text{train}}} \sum_{j=1}^{|\mathbf{x}|} \|W^T e_j(\mathbf{x}) + b - \text{MC}^n(\mathbf{x}, \mathbf{y})_j\|_2^2, \quad (17)$$

800 and define the amortized explainer as  $\text{Amor}(\mathbf{x}) = (W^T e_1(\mathbf{x}) + b, \dots, W^T e_{|\mathbf{x}|}(\mathbf{x}) + b)$ .

801 We use stochastic amortization to produce amortized explainers for tabular datasets and Amortized  
 802 Shap for LLMs to produce explainers for LLM predictions. Both explainers are trained using SVS-12  
 803 as  $\text{MC}^n$ .

## 804 C Selecting Coverage for a Given Inference Budget

805 **Determining Coverage from Inference Budget:** Providing explanations with initial guess in-  
 806 creases the number of model inferences from 1 when using solely the amortized explainer to  $n + 1$ .  
 807 However, a practitioner may have a budget of inferences, i.e., a maximum average number of in-  
 808 ferences they are willing to perform to provide an explanation. We formalize the notion of inference  
 809 budget in Definition 3.

810 **Definition 3** (Inference Budget). Denote by  $N(\text{SE}(\mathbf{x}, \mathbf{y}))$  the number of model inferences to produce  
 811 the explanation  $\text{SE}(\mathbf{x}, \mathbf{y})$ . The inference budget  $N_{\text{budget}} \in \mathbb{N}$  is the maximum average number of  
 812 inferences a practitioner is willing to perform per explanation, i.e., it is such that

$$N_{\text{budget}} \geq \mathbb{E}[N(\text{SE}(\mathbf{x}, \mathbf{y}))]. \quad (18)$$

813 Once an inference budget  $N_{\text{budget}}$  is defined, the coverage  $\alpha$  should be set to follow it. In Proposition  
 814 1, we show the minimum coverage for the selective explanations to follow the inference budget.

815 **Proposition 1** (Coverage for Inference Budget). *Let  $N_{\text{budget}} \geq 1$  be the inference budget, and assume  
 816 that the Monte Carlo method  $\text{MC}^n(\mathbf{x}, \mathbf{y})$  uses  $n$  model inferences. Then, the coverage level  $\alpha$  should  
 817 be chosen such that*

$$\frac{n + 1 - N_{\text{budget}}}{n} = \min_{\alpha \in [0, 1]} \alpha, \text{ such that } \mathbb{E}[N(\text{SE}(\mathbf{x}, \mathbf{y}))] \leq N_{\text{budget}}. \quad (19)$$

818 Recall that SVS- $m$  performs  $n = 1 + dm$  inferences ( $\mathbf{x} \in \mathbb{R}^d$ ), and KS- $m$  performs  $n = m$  inferences.

## D More Experimental Results

In this section, we (i) give further implementation details and (ii) discuss further empirical results.

### D.1 More Details on Experimental Setup

**High-Quality Explanations:** We define the high-quality explanations for the tabular datasets to be given by Kernel Shap with as many inferences as needed for convergence, using the Shapley Regression library [4]. For the textual dataset, following [34], we define the high-quality explanations to be given by Kernel Shap using 8912 model inferences per explanation.

**Amortized Explainers:** For the tabular datasets, we use the amortized explainer from [6] that we describe in Section 2. Specifically, we use a multilayer perceptron model architecture to learn the shapley values for the tabular datasets. For the textual datasets, we use the linear regression on token-level textual embeddings to learn the shapley values, as described in Section 2. Both amortized models learn from the training dataset of explanations generated using Shapley Value Sampling from the Captum library [17] with parameter 12, i.e., SVS-12.

**Uncertainty Metrics:** We test the two proposed uncertainty metrics in Section 3, namely, deep uncertainty and uncertainty learn. For **deep uncertainty**, we run the training pipeline for the amortized explainers 20 times for each dataset we perform experiments on, resulting in 20 different amortized explainer that we use to compute (4). For **uncertainty learn**, we use the multilayer perceptron as the hypothesis class with only one hidden layer. The hidden layer was composed of  $\kappa = 3d$  neurons where  $d$  is the dimension of the input vector  $x \in \mathbb{R}^d$ . The uncertainty learn metric was trained on  $\mathcal{D}_{\text{train}}$ , the same training dataset as the amortized explainers.

**Dataset sizes:** We use 4000 samples from each dataset due to computational limitations on the computation of high-quality explanations used to evaluate selective explanations. All explanations were computed using the Captum library [17]. The dataset  $\mathcal{D}$  with  $N = 4000$  samples was partitioned in three parts,  $\mathcal{D}_{\text{train}}$  with 50% of points,  $\mathcal{D}_{\text{cal}}$  with 25% of points, and  $\mathcal{D}_{\text{test}}$  with the other 25% of points.

**Computational Resources:** All experiments were run in a A100 40 GB GPU. For each dataset, we compute different Monte Carlo explanations. For the UCI-News dataset, the high quality explanations took 4:30 hours to be generate until convergence while for UCI-Adult it took 3:46 hours. For the tabular datasets, all other Monte Carlo explainers were generated in less than 1 hour. For the language models, the high-quality explanations with 8192 model inferences, took 18:51 hours for the Toxigen dataset and 20:00 hours for the Yelp Review datasets. The other used Monte Carlo explanations took proportional (to the number of inferences) time to be generated.

### D.2 Uncertainty Measures Impact on Spearman’s Correlation

Figure 7 shows in the x-axis the coverage ( $\alpha$ ) and in the y-axis the average Spearman’s correlation of the selected amortized explanations from high-quality explanations using deep uncertainty (with 20 models) and the uncertainty learn to select low-quality explanations. The Oracle<sup>7</sup> is computed by sorting examples by the smallest to higher MSE and computing the average Spearman’s correlation in the bottom x-axis points accordingly to the MSE and is the best that can be done in terms of MSE.

Figure 7 shows that the Oracle and proposed uncertainty metrics don’t always select the points with the smallest Spearman’s correlation first. This implies that MSE and Spearman’s correlation don’t always align, i.e., there are points with high MSE and high Spearman’s correlation at the same time. However, we note that the uncertainty learns selector can be applied to **any** metric  $\ell$  as we define in (5) including Spearman’s correlation and any combination of Spearman’s correlation and MSE aiming to approximate both metrics. Moreover, when the smallest MSE aligns with the highest Spearman’s correlation, i.e., the oracle is decreasing in Spearman’s correlation when the coverage increases (Figure 7 (a) and (c)), the proposed uncertainty metrics also accurately detect the low-quality explanations in term of Spearman’s correlation.

<sup>7</sup>The oracle is computationally expensive because it requires access to high-quality explanations.

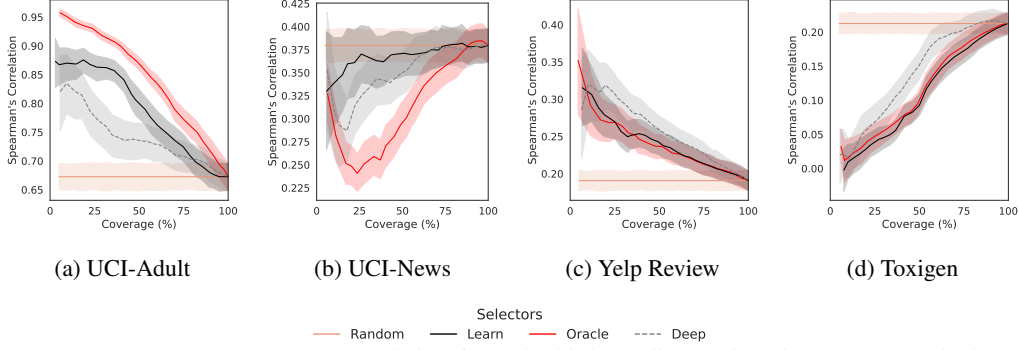

Fig. 7: Coverage vs. Spearman's correlation from the high-quality explanation. Coverage is the percentage of the points that the selection function predicts that will receive a higher-quality explanation, i.e.,  $\tau_t(x) = 1$ . When coverage is 100% Spearman's correlation is the average performance for the amortized explainer.

### 866 D.3 The Effect of Explanations with Initial Guess

867 In Figure 8 we compare explanations with initial guess (Definition 2) to only using the Monte Carlo  
 868 to provide recourse to the low-quality explanaitons, i.e.,  $\lambda_h = 0$  we call it Naive. In all tested cases,  
 869 Spearman's correlation of the Monte Carlo method is comparable to or larger than the amortized  
 870 explainer. Although selective explanations optimized for MSE by using explanations with initial  
 871 guess (Definition 2), we observe that the Spearman's correlation of selective explanations is close to  
 872 or larger than the naive method, once again, demonstrating the efficacy of selective explanations.

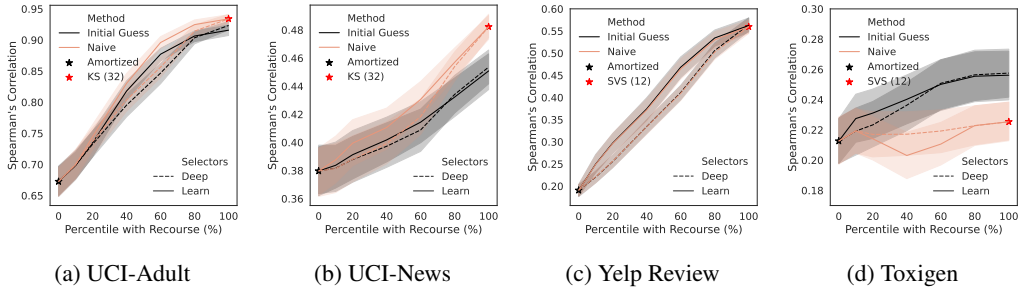

Fig. 8: Fraction of the population that receive explanations with initial guess (x-axis) vs. their Spearman's correlation from the high-quality explanations (y-axis). Naive uses  $\lambda_h = 0$  while initial guess uses explanations with initial guess, i.e., when  $\lambda_h$  is given in (12).

### 873 D.4 Performance for Different Monte-Carlo Explainers

874 Figure 9 shows how the MSE and Spearman's correlation behave accordingly with the quality of the  
 875 Monte Carlo explainer. We compare Kernel Shap and Shapley Value Sampling in all experiments. We  
 876 observe that when the quality of the Monte Carlo explainer increases, the quality of the Selective ex-  
 877 planation also increases, i.e., the MSE decreases and the Spearman's correlation increases. Moreover,  
 878 we also observe diminishing returns, i.e., after a certain point, increasing the quality of the Monte  
 879 Carlo explanations doesn't lead to a tailored increase in performance. For example, observe the SVS  
 880 method in the tabular datasets Figure 9 (a) and (b). We also observe that providing explanations  
 881 with initial guess has a high impact on both Spearman's correlation and MSE when only providing  
 882 recourse to a small fraction of the population. For example, when providing explanations with initial  
 883 guess for 20% of the population using SVS-12 in the Yelp Review dataset, Figure 9 (c), increases the  
 884 Spearman's correlation in more than 50% (from 0.2 to more than 0.3).

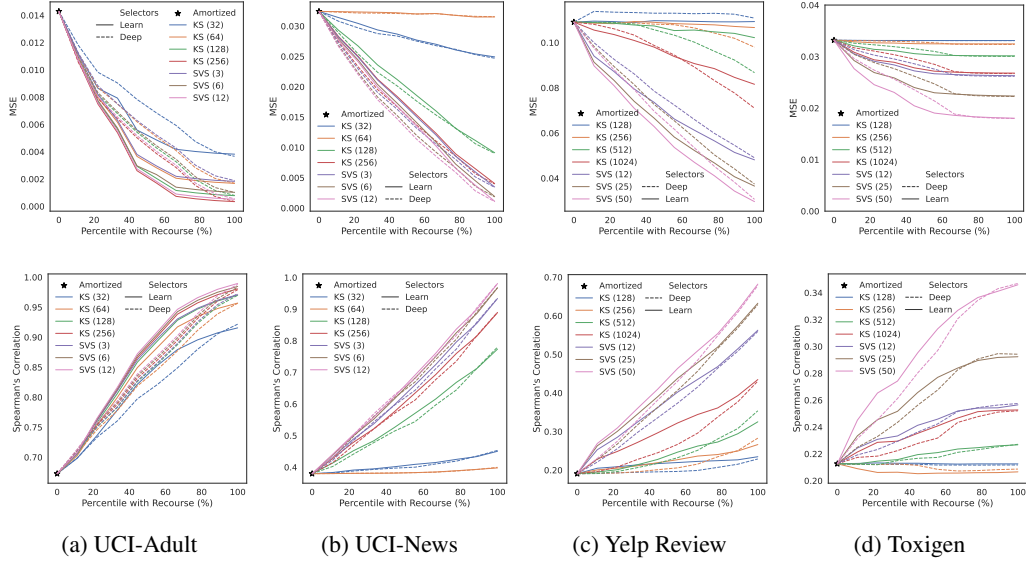

Fig. 9: MSE (top) and Spearman's correlation (bottom) for selective explanations using different Monte Carlo explainers.

## 885 D.5 Time Sharing Using Selective Explanations

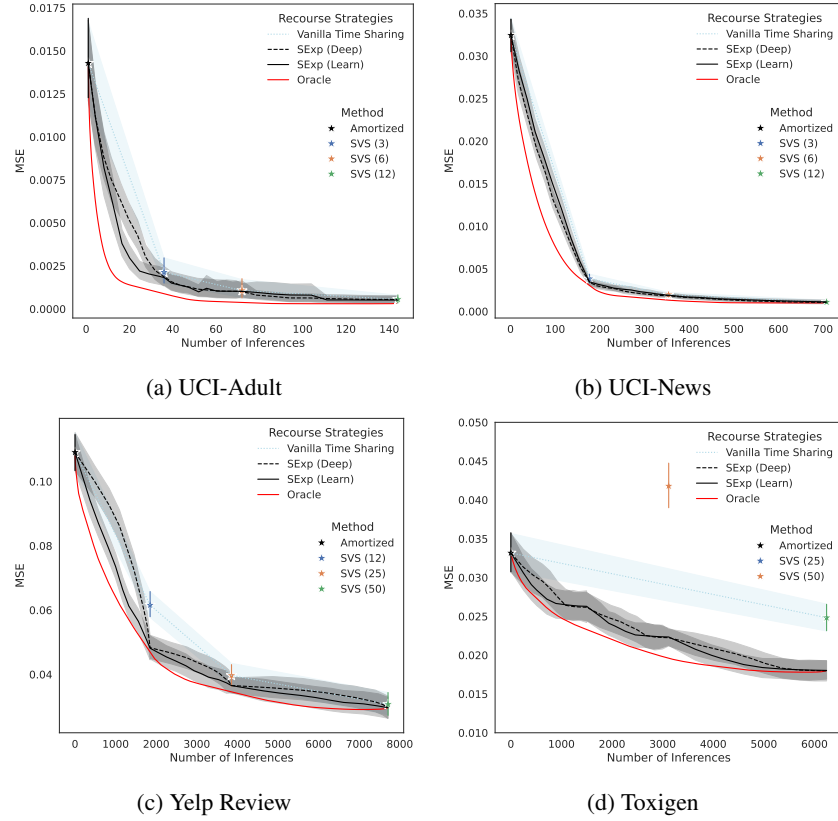

Fig. 10: Number of model inferences (x-axis) vs. MSE (y-axis) using (i) vanilla time sharing, (ii) time sharing using selective explanations compared to (iii) the oracle when the MSE of the provided explanation is known.

We analyze how selective explanations can be used to improve the quality of Monte Carlo methods by time sharing between methods. When computing explanations using Monte Carlo methods, we perform  $n$  model inferences (x-axis in Figure 10) until a desired MSE (y-axis in Figure 10) is achieved. This is done by gradually increasing the number of inferences per points we generate explanations – this is displayed by the blue dotted curve in Figure 10 and we name it vanilla time sharing because the inferences (time) are shared gradually across points. We also compare it with the Oracle given the red curve in Figure 10 where, for each point, we compute Monte Carlo explanations using SVS with parameter 12, 25, and 50, compute their MSE to high-quality explanations and give the best explanation possible for a given number of inferences. Oracle is the best that can be done in terms of MSE vs. Number of Inferences only using Monte Carlo explanations. We compare both Oracle and vanilla time sharing with time sharing using selective explanations given by the black lines in Figure 10. For the time sharing using selective explanations, we also gradually increase the number of inferences but use selective explanations instead of plain Monte Carlo explanations.

Figure 10 shows that selective explanations closely approximate the Oracle curve, indicating the selective explanations have close to optimal trade-off between the number of model inferences and MSE. We highlight the performance of selective explanations in the Toxigen dataset. With only 1000 model inferences, we get better performance than using SVS-50 with about 6000 model inferences. We also note that in both LLMs, using selective explanations closely approximates the oracle and provides a better explanation with the same number of inferences than just using SVS.

## E Proofs of Theoretical Results

**Theorem 1** (Optimal  $\lambda_i$ ). *Let  $0 = \alpha_1 < \alpha_2 < \dots < \alpha_m = 1$  and define  $Q_i$  as in (9). Then,  $\lambda_i$  that solves the optimization problem in (11) is given by*

$$\lambda_i = \frac{\sum_{\substack{(\mathbf{x}, \mathbf{y}) \in \mathcal{D}_{\text{val}} \\ s_h(\mathbf{x}) \in Q_i}} \langle MC^n(\mathbf{x}, \mathbf{y}) - MC^{n'}(\mathbf{x}, \mathbf{y}), MC^n(\mathbf{x}, \mathbf{y}) - \text{Amor}(\mathbf{x}, \mathbf{y}) \rangle}{\sum_{\substack{(\mathbf{x}, \mathbf{y}) \in \mathcal{D}_{\text{val}} \\ s_h(\mathbf{x}) \in Q_i}} \| \text{Amor}(\mathbf{x}, \mathbf{y}) - MC^n(\mathbf{x}, \mathbf{y}) \|_2^2}. \quad (20)$$

*Proof.* First, recall that

$$\lambda_i \triangleq \underset{\lambda \in \mathbb{R}}{\operatorname{argmin}} \sum_{\substack{(\mathbf{x}, \mathbf{y}) \in \mathcal{D}_{\text{val}} \\ s_h(\mathbf{x}) \in Q_i}} \left\| \text{SE}(\mathbf{x}, \mathbf{y}) - MC^{n'}(\mathbf{x}, \mathbf{y}) \right\|_2^2 \quad (21)$$

$$= \underset{\lambda \in \mathbb{R}}{\operatorname{argmin}} \sum_{\substack{(\mathbf{x}, \mathbf{y}) \in \mathcal{D}_{\text{val}} \\ s_h(\mathbf{x}) \in Q_i}} \left\| \lambda \text{Amor}(\mathbf{x}, \mathbf{y}) + (1 - \lambda) MC^n(\mathbf{x}, \mathbf{y}) - MC^{n'}(\mathbf{x}, \mathbf{y}) \right\|_2^2. \quad (22)$$

Note that the function in (22) is convex in  $\lambda$ ; therefore, if the derivative of it with respect to  $\lambda$  is zero, then the lambda that achieves the zero gradient is the minima. So, let's derivate (22) to find  $\lambda_i$ .

$$0 = \frac{d}{d\lambda} \sum_{\substack{(\mathbf{x}, \mathbf{y}) \in \mathcal{D}_{\text{val}} \\ s_h(\mathbf{x}) \in Q_i}} \left\| \lambda \text{Amor}(\mathbf{x}, \mathbf{y}) + (1 - \lambda) MC^n(\mathbf{x}, \mathbf{y}) - MC^{n'}(\mathbf{x}, \mathbf{y}) \right\|_2^2 \quad (23)$$

$$= 2 \sum_{\substack{(\mathbf{x}, \mathbf{y}) \in \mathcal{D}_{\text{val}} \\ s_h(\mathbf{x}) \in Q_i}} \lambda \| MC^n(\mathbf{x}, \mathbf{y}) - \text{Amor}(\mathbf{x}, \mathbf{y}) \|^2 \quad (24)$$

$$- 2 \sum_{\substack{(\mathbf{x}, \mathbf{y}) \in \mathcal{D}_{\text{val}} \\ s_h(\mathbf{x}) \in Q_i}} \langle MC^n(\mathbf{x}, \mathbf{y}) - MC^{n'}(\mathbf{x}, \mathbf{y}), MC^n(\mathbf{x}, \mathbf{y}) - \text{Amor}(\mathbf{x}, \mathbf{y}) \rangle \quad (25)$$

From (25) we conclude the proof by showing that

$$\lambda_i = \lambda = \frac{\sum_{\substack{(\mathbf{x}, \mathbf{y}) \in \mathcal{D}_{\text{val}} \\ s_h(\mathbf{x}) \in Q_i}} \langle MC^n(\mathbf{x}, \mathbf{y}) - MC^{n'}(\mathbf{x}, \mathbf{y}), MC^n(\mathbf{x}, \mathbf{y}) - \text{Amor}(\mathbf{x}, \mathbf{y}) \rangle}{\sum_{\substack{(\mathbf{x}, \mathbf{y}) \in \mathcal{D}_{\text{val}} \\ s_h(\mathbf{x}) \in Q_i}} \| MC^n(\mathbf{x}, \mathbf{y}) - \text{Amor}(\mathbf{x}, \mathbf{y}) \|^2}. \quad (26)$$



912

□

913 **Theorem 2** ( $\lambda_i \approx \lambda_i^{\text{opt}}$ ). Let the Monte Carlo explanation used to provide recourse  $\text{MC}^n$  to be  
 914 different enough from the amortized explainer, i.e.,  $\mathbb{E} [\|\text{MC}^n(X, Y) - \text{Amor}(X, Y)\|^2] = \mu > 0$ .  
 915 Also, assume that  $\text{MC}^{n'}$  is a good Monte Carlo approximation for the high-quality explainer  $\text{HQ}$ , i.e.,  
 916  $\mathbb{E} [\|\text{MC}^{n'}(X, Y) - \text{HQ}(X, Y)\|^2] = \mu^*$  for  $\epsilon > \frac{\sqrt{5}\mu^*}{\mu}$ . Recall that  $\mathbf{x} \in \mathbb{R}^d$ . If the explanations are  
 917 bounded, i.e.,  $\|\text{MC}^n(\mathbf{x}, \mathbf{y})\|, \|\text{Amor}(\mathbf{x}, \mathbf{y})\|, \|\text{HQ}(\mathbf{x}, \mathbf{y})\| < Cd$  for some  $C > 0$  then

$$\Pr[|\lambda_i - \lambda_i^{\text{opt}}| > \epsilon] \leq e^{\frac{-\mu^2|Q_i|}{4Cd}} + e^{\frac{-\mu^4\epsilon^4|Q_i|}{400Cd}}, \quad (27)$$

918 where  $|Q_i|$  is the number of points  $\mathbf{x}$  in the validation dataset  $\mathcal{D}_{\text{val}}$  that are in the bin  $Q_i$ .

919 *Proof.* Denote  $|Q_i| = |\{(\mathbf{x}, \mathbf{y}) \in \mathcal{D}_{\text{val}}, \text{ s.t. } s_h(\mathbf{x}) \in Q_i\}|$ .

920 We start by showing that if  $\mathbb{E} [\|\text{MC}^n(X, Y) - \text{Amor}(X, Y)\|^2] = \mu$  then

$$\Pr \left[ \frac{1}{|Q_i|} \sum_{\substack{(\mathbf{x}, \mathbf{y}) \in \mathcal{D}_{\text{val}} \\ s_h(\mathbf{x}) \in Q_i}} \|\text{MC}^n(\mathbf{x}, \mathbf{y}) - \text{Amor}(\mathbf{x}, \mathbf{y})\|^2 \leq \frac{\mu}{2} \right] \quad (28)$$

$$= \Pr \left[ \mu - \frac{1}{|Q_i|} \sum_{\substack{(\mathbf{x}, \mathbf{y}) \in \mathcal{D}_{\text{val}} \\ s_h(\mathbf{x}) \in Q_i}} \|\text{MC}^n(\mathbf{x}, \mathbf{y}) - \text{Amor}(\mathbf{x}, \mathbf{y})\|^2 \geq \frac{\mu}{2} \right] \quad (29)$$

$$\leq e^{\frac{-\mu^2|Q_i|}{4Cd}}. \quad (30)$$

921 Where the inequality in (30) follows from Hoeffding's inequality and the fact that:

$$\|\text{MC}^n(\mathbf{x}, \mathbf{y}) - \text{Amor}(\mathbf{x}, \mathbf{y})\|^2 \leq \|\text{MC}^n(\mathbf{x}, \mathbf{y})\|^2 + \|\text{Amor}(\mathbf{x}, \mathbf{y})\|^2 \leq 2Cd. \quad (31)$$

922 Second, we recall that  $\mathbb{E} [\|\text{MC}^{n'}(X, Y) - \text{HQ}(X, Y)\|^2] = \mu^* \leq \frac{\mu^2\epsilon^2}{5}$ . Then, we have that

$$\Pr \left[ \frac{1}{|Q_i|} \sum_{\substack{(\mathbf{x}, \mathbf{y}) \in \mathcal{D}_{\text{val}} \\ s_h(\mathbf{x}) \in Q_i}} \|\text{HQ}(\mathbf{x}, \mathbf{y}) - \text{Amor}(\mathbf{x}, \mathbf{y})\|^2 \geq \epsilon^2 \frac{\mu^2}{4} \right] \quad (32)$$

$$= \Pr \left[ \frac{1}{|Q_i|} \sum_{\substack{(\mathbf{x}, \mathbf{y}) \in \mathcal{D}_{\text{val}} \\ s_h(\mathbf{x}) \in Q_i}} \|\text{HQ}(\mathbf{x}, \mathbf{y}) - \text{Amor}(\mathbf{x}, \mathbf{y})\|^2 - \mu^* \geq \epsilon^2 \frac{\mu^2}{4} - \mu^* \right] \quad (33)$$

$$\leq \Pr \left[ \frac{1}{|Q_i|} \sum_{\substack{(\mathbf{x}, \mathbf{y}) \in \mathcal{D}_{\text{val}} \\ s_h(\mathbf{x}) \in Q_i}} \|\text{HQ}(\mathbf{x}, \mathbf{y}) - \text{Amor}(\mathbf{x}, \mathbf{y})\|^2 - \mu^* \geq \epsilon^2 \frac{\mu^2}{20} \right] \quad (34)$$

$$\leq e^{\frac{-\mu^4\epsilon^4|Q_i|}{400Cd}}. \quad (35)$$

923 Where the inequality in (35) follows from Hoeffding's inequality and the fact that:

$$\|\text{HQ}(\mathbf{x}, \mathbf{y}) - \text{Amor}(\mathbf{x}, \mathbf{y})\|^2 \leq \|\text{HQ}(\mathbf{x}, \mathbf{y})\|^2 + \|\text{Amor}(\mathbf{x}, \mathbf{y})\|^2 \leq 2Cd. \quad (36)$$

924 Third, notice by directly applying Theorem 1 and replacing the Monte Carlo explanation by the  
 925 high-quality explanation, we have that

$$\lambda_i^{\text{opt}} = \frac{\sum_{\substack{(\mathbf{x}, \mathbf{y}) \in \mathcal{D}_{\text{val}} \\ s_h(\mathbf{x}) \in Q_i}} \langle \text{MC}^n(\mathbf{x}, \mathbf{y}) - \text{HQ}(\mathbf{x}, \mathbf{y}), \text{MC}^n(\mathbf{x}, \mathbf{y}) - \text{Amor}(\mathbf{x}, \mathbf{y}) \rangle}{\sum_{\substack{(\mathbf{x}, \mathbf{y}) \in \mathcal{D}_{\text{val}} \\ s_h(\mathbf{x}) \in Q_i}} \|\text{MC}^n(\mathbf{x}, \mathbf{y}) - \text{Amor}(\mathbf{x}, \mathbf{y})\|^2}. \quad (37)$$

926 Hence, we can write  $\lambda_i^{\text{opt}} - \lambda_i$  as

$$|\lambda_i^{\text{opt}} - \lambda_i| \quad (38)$$

$$= \left| \frac{\sum_{\substack{(\mathbf{x}, \mathbf{y}) \in \mathcal{D}_{\text{val}} \\ s_h(\mathbf{x}) \in Q_i}} \langle \mathbf{MC}^{n'}(\mathbf{x}, \mathbf{y}) - \text{HQ}(\mathbf{x}, \mathbf{y}), \mathbf{MC}^n(\mathbf{x}, \mathbf{y}) - \text{Amor}(\mathbf{x}, \mathbf{y}) \rangle}{\sum_{\substack{(\mathbf{x}, \mathbf{y}) \in \mathcal{D}_{\text{val}} \\ s_h(\mathbf{x}) \in Q_i}} \|\mathbf{MC}^n(\mathbf{x}, \mathbf{y}) - \text{Amor}(\mathbf{x}, \mathbf{y})\|^2} \right| \quad (39)$$

$$\leq \frac{\left( \sum_{\substack{(\mathbf{x}, \mathbf{y}) \in \mathcal{D}_{\text{val}} \\ s_h(\mathbf{x}) \in Q_i}} \|\mathbf{MC}^{n'}(\mathbf{x}, \mathbf{y}) - \text{HQ}(\mathbf{x}, \mathbf{y})\|_2^2 \|\mathbf{MC}^n(\mathbf{x}, \mathbf{y}) - \text{Amor}(\mathbf{x}, \mathbf{y})\|_2^2 \right)^{1/2}}{\sum_{\substack{(\mathbf{x}, \mathbf{y}) \in \mathcal{D}_{\text{val}} \\ s_h(\mathbf{x}) \in Q_i}} \|\mathbf{MC}^n(\mathbf{x}, \mathbf{y}) - \text{Amor}(\mathbf{x}, \mathbf{y})\|^2}, \quad (40)$$

where the last inequality (40) comes from the Cauchy–Schwarz inequality. Denote the denominator in (40) by  $\Delta$ , i.e.,

$$\sum_{\substack{(\mathbf{x}, \mathbf{y}) \in \mathcal{D}_{\text{val}} \\ s_h(\mathbf{x}) \in Q_i}} \|\mathbf{MC}^n(\mathbf{x}, \mathbf{y}) - \text{Amor}(\mathbf{x}, \mathbf{y})\|^2 = \Delta.$$

927 Lastly, notice that  $\mathbf{MC}^{n'}(\mathbf{x}, \mathbf{y})$  is sampled independently of  $\mathbf{MC}^n(\mathbf{x}, \mathbf{y})$  and that  $\text{HQ}(\mathbf{x}, \mathbf{y})$  is deter-  
928 ministic. Therefore:

$$\Pr[|\lambda_i^{\text{opt}} - \lambda_i| \geq \epsilon] \quad (41)$$

$$\leq \Pr \left[ \frac{\left( \sum_{\substack{(\mathbf{x}, \mathbf{y}) \in \mathcal{D}_{\text{val}} \\ s_h(\mathbf{x}) \in Q_i}} \|\mathbf{MC}^{n'}(\mathbf{x}, \mathbf{y}) - \text{HQ}(\mathbf{x}, \mathbf{y})\|_2^2 \|\mathbf{MC}^n(\mathbf{x}, \mathbf{y}) - \text{Amor}(\mathbf{x}, \mathbf{y})\|_2^2 \right)^{1/2}}{\sum_{\substack{(\mathbf{x}, \mathbf{y}) \in \mathcal{D}_{\text{val}} \\ s_h(\mathbf{x}) \in Q_i}} \|\mathbf{MC}^n(\mathbf{x}, \mathbf{y}) - \text{Amor}(\mathbf{x}, \mathbf{y})\|^2} \geq \epsilon \right] \quad (42)$$

$$\leq \Pr \left[ \frac{\sum_{\substack{(\mathbf{x}, \mathbf{y}) \in \mathcal{D}_{\text{val}} \\ s_h(\mathbf{x}) \in Q_i}} \|\mathbf{MC}^{n'}(\mathbf{x}, \mathbf{y}) - \text{HQ}(\mathbf{x}, \mathbf{y})\|_2^2 \|\mathbf{MC}^n(\mathbf{x}, \mathbf{y}) - \text{Amor}(\mathbf{x}, \mathbf{y})\|_2^2}{\Delta^2} \geq \epsilon^2 \right] \quad (43)$$

$$\leq \Pr \left[ \frac{\sum_{\substack{(\mathbf{x}, \mathbf{y}) \in \mathcal{D}_{\text{val}} \\ s_h(\mathbf{x}) \in Q_i}} \|\mathbf{MC}^{n'}(\mathbf{x}, \mathbf{y}) - \text{HQ}(\mathbf{x}, \mathbf{y})\|_2^2 \|\mathbf{MC}^n(\mathbf{x}, \mathbf{y}) - \text{Amor}(\mathbf{x}, \mathbf{y})\|_2^2}{\Delta^2} \geq \epsilon^2 \mid \Delta \leq \frac{\mu}{2} \right]$$

$$\times \Pr \left[ \Delta \leq \frac{\mu}{2} \right]$$

$$+ \Pr \left[ \frac{\sum_{\substack{(\mathbf{x}, \mathbf{y}) \in \mathcal{D}_{\text{val}} \\ s_h(\mathbf{x}) \in Q_i}} \|\mathbf{MC}^{n'}(\mathbf{x}, \mathbf{y}) - \text{HQ}(\mathbf{x}, \mathbf{y})\|_2^2 \|\mathbf{MC}^n(\mathbf{x}, \mathbf{y}) - \text{Amor}(\mathbf{x}, \mathbf{y})\|_2^2}{\Delta^2} \geq \epsilon^2 \mid \Delta > \frac{\mu}{2} \right]$$

$$\times \Pr \left[ \Delta > \frac{\mu}{2} \right] \quad (44)$$

$$\leq \Pr \left[ \sum_{\substack{(\mathbf{x}, \mathbf{y}) \in \mathcal{D}_{\text{val}} \\ s_h(\mathbf{x}) \in Q_i}} \|\mathbf{MC}^{n'}(\mathbf{x}, \mathbf{y}) - \text{HQ}(\mathbf{x}, \mathbf{y})\|_2^2 \|\mathbf{MC}^n(\mathbf{x}, \mathbf{y}) - \text{Amor}(\mathbf{x}, \mathbf{y})\|_2^2 \geq \epsilon^2 \frac{\mu^2}{4} \right] \\ + \Pr \left[ \Delta \leq \frac{\mu}{2} \right] \quad (45)$$

$$\leq e^{-\frac{\mu^2 |Q_i|}{4Cd}} + e^{-\frac{\mu^4 \epsilon^4 |Q_i|}{400Cd}}. \quad (46)$$

929 Where the inequality in (42) is a direct application of 40, the inequality in (44) comes from simply  
930 conditioning, the inequality in (45) comes from the fact that probabilities are bounded by one getting



931 rid of the first term in (45) (first out of lines) and the fourth term in (45) (forth out of lines) and the  
 932 fact that  $\text{MC}^{n'}(\mathbf{x}, \mathbf{y})$  is sampled independently of  $\text{MC}^n(\mathbf{x}, \mathbf{y})$  and that  $\text{HQ}(\mathbf{x}, \mathbf{y})$  is deterministic.  
 933 Finally, the last inequality in (46) comes from applying (30) and (35).

934 Hence, from (46), we conclude that

$$\Pr[|\lambda_i^{\text{opt}} - \lambda_i| \geq \epsilon] \leq e^{-\frac{\mu^2 |Q_i|}{4Cd}} + e^{-\frac{\mu^4 \epsilon^4 |Q_i|}{400Cd}}. \quad (47)$$

935

□

936 **Proposition 2** (Coverage for Inference Budget). *Let  $N_{\text{budget}} \geq 1$  be the set inference budget, and*  
 937 *assume that the Monte Carlo method  $\text{MC}^n(\mathbf{x}, \mathbf{y})$  uses  $n$  model inferences. Then, the coverage level*  
 938  *$\alpha$  should be chosen such that*

$$\underset{\alpha \in [0,1]}{\text{argmin}} \{ \mathbb{E} [N(\text{SE}(\mathbf{x}, \mathbf{y}))] \leq N_{\text{budget}} \} = \frac{n+1-N_{\text{budget}}}{n}. \quad (48)$$

939 *Recall that Shapley Value Sampling with parameter  $m$  performs  $1+dm$  inferences ( $\mathbf{x} \in \mathbb{R}^d$ ), and*  
 940 *Kernel Shap with parameter  $m$  performs  $m$  inferences.*

941 *Proof.* Let  $\alpha \in [0, 1]$ , then an  $\alpha$  portion of examples receive explanations from the amortized  
 942 explainer, i.e., they receive one inference, and  $1 - \alpha$  portion of examples receive explanations with  
 943 initial guess, i.e.,  $n$  model inferences. Therefore, the expected number of model inferences per  
 944 instance is given by (49).

$$\mathbb{E} [N(\text{SE}(\mathbf{x}, \mathbf{y}))] = \alpha + (1 - \alpha)(n + 1) \quad (49)$$

945 In order for the inference budget to be followed, it is necessary that

$$\mathbb{E} [N(\text{SE}(\mathbf{x}, \mathbf{y}))] = \alpha + (1 - \alpha)(n + 1) \leq N_{\text{budget}}. \quad (50)$$

946 From (50), we conclude that:

$$\alpha \geq \frac{n+1-N_{\text{budget}}}{n}, \quad (51)$$

947 Hence,

$$\underset{\alpha \in [0,1]}{\text{argmin}} \{ \mathbb{E} [N(\text{SE}(\mathbf{x}, \mathbf{y}))] \leq N_{\text{budget}} \} = \frac{n+1-N_{\text{budget}}}{n}. \quad (52)$$

948

□
